# Supplementary material for: Photo-induced morphological winding and unwinding motion of nanoscrolls composed of niobate nanosheets with a polyfluoroalkyl azobenzene derivative
Source: Royal Society of Chemistry journal article supplement (doi:10.1039/c6nr02177h), 2016-01-01
Supplement: c6nr02177h1.pdf [file c6nr02177h1.pdf]

Electronic Supplementary information

Photo-induced Rolling-up Motion of Nanoscroll Composed of Niobate Nanosheet and Photochromic Compound

Authors: Yu Nabetani\*, Hazuki Takamura, Akino Uchikoshi, Syed Zahid Hassan, Tetsuya Shimada, Shinsuke Takagi, Hiroshi Tachibana, Dai Masui, Zhiwei Tong, Haruo Inoue\*\*

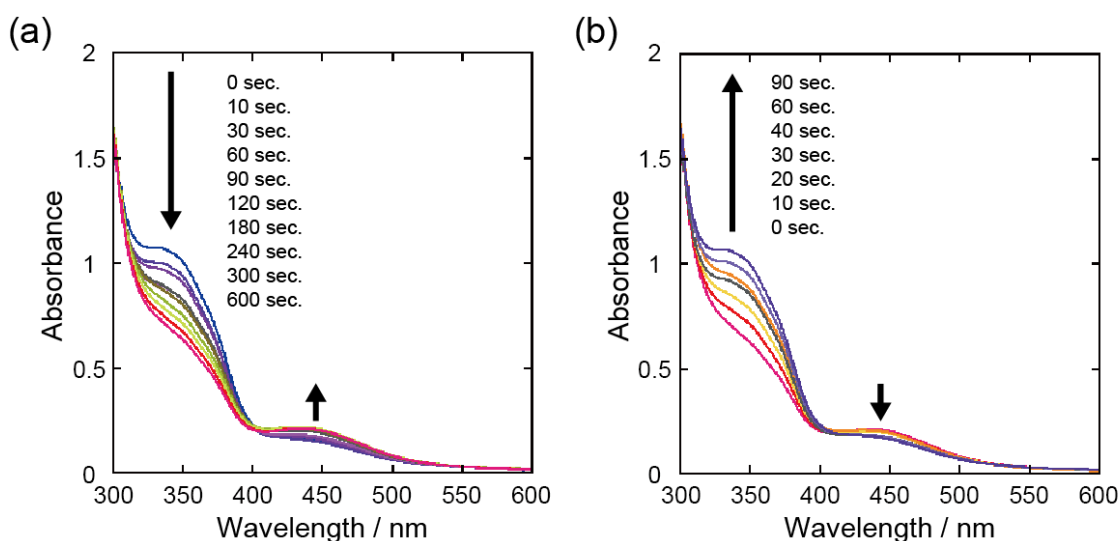

**Fig. S1.** Photo-isomerization reaction of nanoscroll: (a) *trans* to *cis* reaction by UV light ( $\lambda_{UV} = 365$  nm,  $2.1$  mW cm<sup>-2</sup>) and (b) *cis* to *trans* reaction by visible light ( $\lambda_{Vis.} = 470$  nm,  $1.2$  mW cm<sup>-2</sup>). The nanoscroll were cast on a cover glass to allow the light irradiation and the measurement of absorption spectroscopy.
